# Supplementary material for: Gut-Brain Axis Cross-Talk and Limbic Disorders as Biological Basis of Secondary TMAU
Source: MDPI journal article supplement (doi:10.3390/jpm11020087), 2021-01-31
Supplement: s1 [file s1]

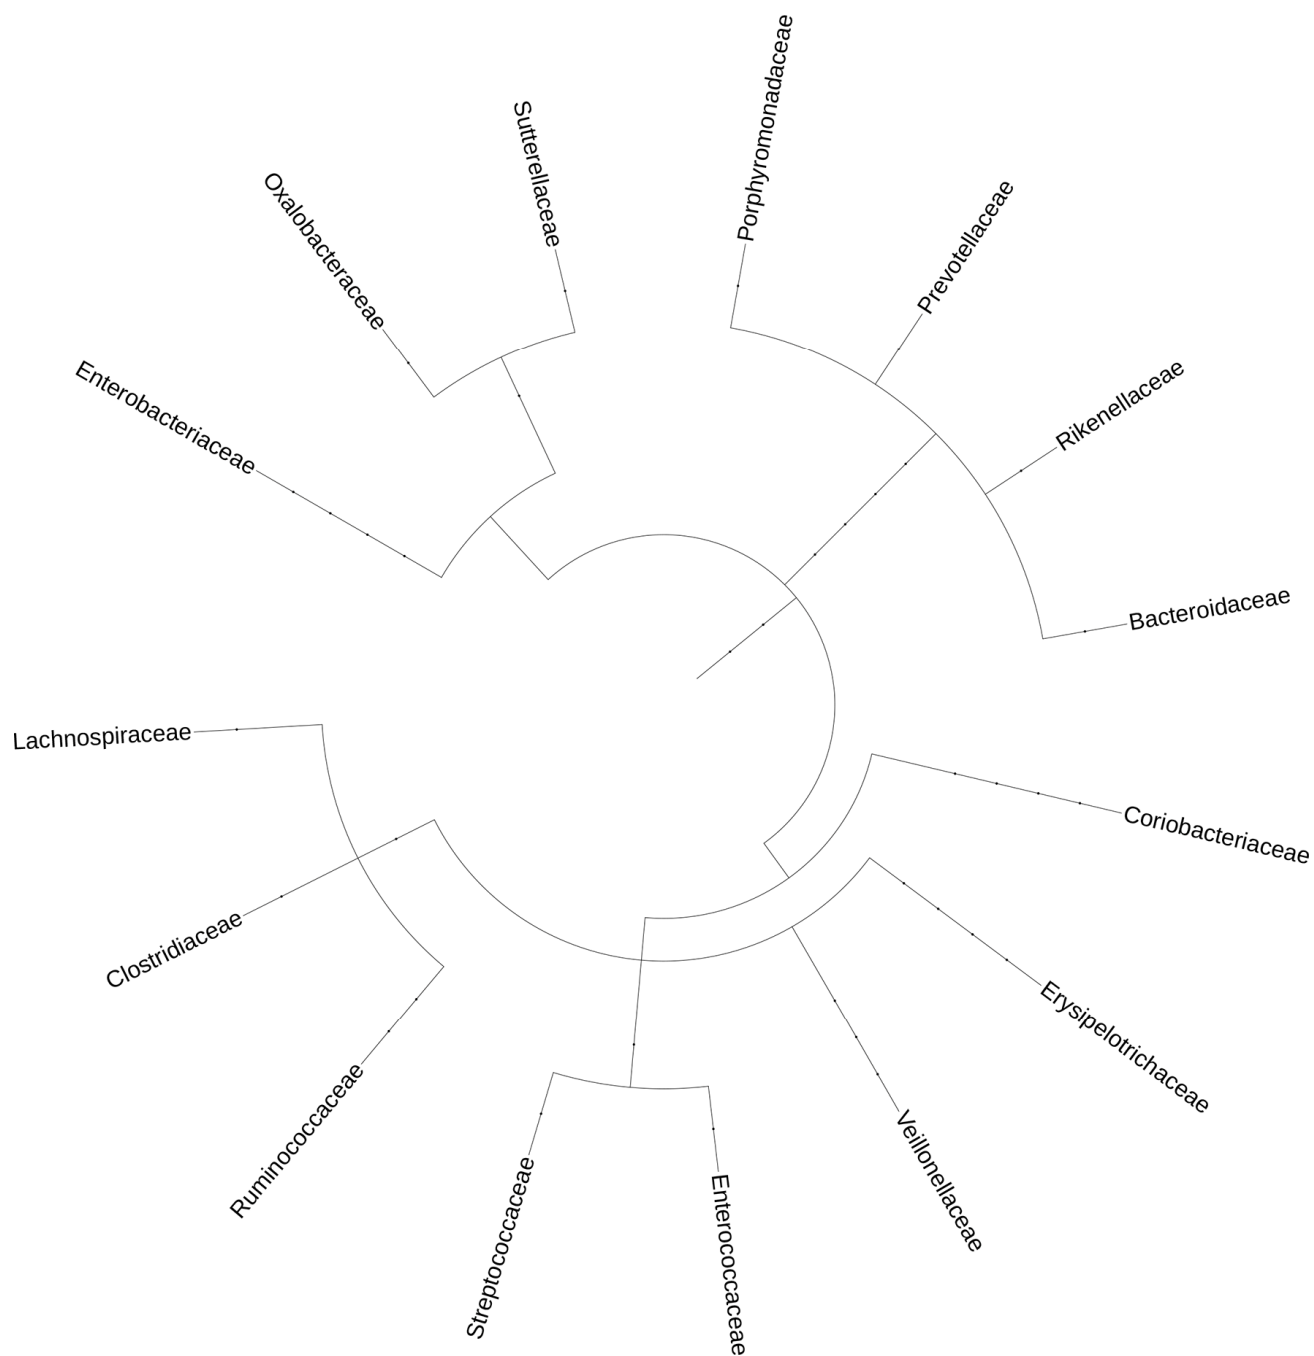

**Figure S1. Cladogram of most altered bacterial families in TMAU behavioral disordered cases.** All bacterial families which showed expression differences through microbiota of TMAU patients considered as cases resulted phylogenetically correlated each other.
